# Supplementary material for: Prevalence and impact of airway diseases on clinical outcomes in idiopathic pulmonary fibrosis
Source: PubMed Central journal article supplement — Korean J Intern Med. 2021 Dec 7;37(2):387–97. doi: 10.3904/kjim.2021.025 (PMC8925941; doi:10.3904/kjim.2021.025), 2021-12-07
Supplement: kjim-2021-025-suppl1.pdf [file kjim-2021-025-suppl1.pdf]

**Supplementary Table 1. Comparison of the groups with and without airway diseases**

| Variable                                         | Without airway diseases (n = 64) | With airway diseases (n = 6) | p value              |
|--------------------------------------------------|----------------------------------|------------------------------|----------------------|
| Age, yr                                          | 68.30 ± 0.94                     | 72.00 ± 3.00                 | 0.279                |
| Male sex                                         | 48 (75.0)                        | 4 (66.7)                     | 0.643                |
| BMI, kg/m <sup>2</sup>                           | 24.45 ± 0.36                     | 22.82 ± 0.81                 | 0.182                |
| Smoking status                                   |                                  |                              | 0.485                |
| Never                                            | 25 (41.7)                        | 1 (20.0)                     |                      |
| Ever                                             | 33 (55.0)                        | 4 (80.0)                     |                      |
| Current                                          | 2 (3.3)                          | 0                            |                      |
| Smoking amount, pack-yr                          | 15.35 ± 2.23                     | 22.00 ± 6.04                 | 0.331                |
| FEV1, % pred                                     | 91.53 ± 2.16                     | 73.83 ± 3.88                 | 0.006 <sup>a</sup>   |
| FVC, % pred                                      | 77.47 ± 1.90                     | 75.00 ± 5.03                 | 0.721                |
| DLco, % pred                                     | 67.27 ± 2.11                     | 52.60 ± 5.95                 | 0.059                |
| FEV1/FVC, % pred                                 | 81.66 ± 0.74                     | 67.67 ± 2.84                 | < 0.001 <sup>a</sup> |
| FEV1, 3-month follow-up, % pred <sup>b</sup>     | 91.16 ± 2.36                     | 78.83 ± 4.57                 | 0.086                |
| FVC, 3-month follow-up, % pred <sup>b</sup>      | 77.39 ± 2.08                     | 77.33 ± 5.62                 | 0.915                |
| DLco, 3-month follow-up, % pred <sup>b</sup>     | 65.86 ± 2.54                     | 49.33 ± 4.84                 | 0.105                |
| FEV1/FVC, 3-month follow-up, % pred <sup>b</sup> | 81.54 ± 0.87                     | 70.33 ± 3.31                 | 0.003 <sup>a</sup>   |
| 6MWD, m                                          | 484.30 ± 10.76                   | 388.50 ± 43.92               | 0.036 <sup>a</sup>   |
| 6MWT, nadir SpO <sub>2</sub> , %                 | 87.76 ± 0.98                     | 84.17 ± 5.25                 | 0.603                |
| mMRC dyspnea scale                               |                                  |                              | 0.181                |
| 0                                                | 25 (39.1)                        | 3 (50)                       |                      |
| 1                                                | 25 (39.1)                        | 1 (16.7)                     |                      |
| 2                                                | 9 (14.1)                         | 1 (16.7)                     |                      |
| 3                                                | 1 (1.6)                          | 1 (16.7)                     |                      |
| CAT                                              | 14.78 ± 1.14                     | 13.50 ± 3.90                 | 0.671                |
| SGRQ                                             | 29.09 ± 2.65                     | 33.16 ± 9.05                 | 0.721                |
| EQ-5D index                                      | 0.850 ± 0.071                    | 0.744 ± 0.064                | 0.701                |
| CQLQ                                             | 47.00 ± 1.66                     | 49.83 ± 8.60                 | 0.628                |
| Cough VAS                                        | 3.31 ± 0.36                      | 4.33 ± 1.20                  | 0.331                |

Values are presented as mean ± standard error or number (%). Differences between two groups were tested with *t* tests for continuous variables and chi-squared test for dichotomous variables.

BMI, body mass index; FEV1, forced expiratory volume in 1 second; % pred, % of predicted value; FVC, forced vital capacity; DLco, diffusing capacity for carbon monoxide; 6MWD, distance of 6-minute walk test; 6MWT, 6-minute walk test; SpO<sub>2</sub>, resting peripheral oxygen saturation; mMRC, modified Medical Research Council; CAT, chronic obstructive pulmonary disease (COPD) assessment test; SGRQ, St. George's Respiratory Questionnaire; EQ-5D, EuroQol-5 dimension; CQLQ, cough quality of life questionnaire; VAS, visual analogue scale.

<sup>a</sup>*p* < 0.05.

<sup>b</sup>Values were results of *t* tests with 59 patients who had 3-month follow-up data.
