# Supplementary material for: Prevalence and impact of airway diseases on clinical outcomes in idiopathic pulmonary fibrosis
Source: PubMed Central journal article supplement — Korean J Intern Med. 2021 Dec 7;37(2):387–97. doi: 10.3904/kjim.2021.025 (PMC8925941; doi:10.3904/kjim.2021.025), 2021-12-07
Supplement: kjim-2021-025-suppl2.pdf [file kjim-2021-025-suppl2.pdf]

**Supplementary Table 2. Changes in clinical outcomes according to the presence of airway diseases**

| Variable  | Without airway diseases (n = 53) | With airway diseases (n = 6) | p value <sup>a</sup> |
|-----------|----------------------------------|------------------------------|----------------------|
| CAT       | 1.87 ± 0.89                      | 7.33 ± 2.26                  | 0.052                |
| SGRQ      | 2.270 ± 1.61                     | 13.450 ± 7.17                | 0.040 <sup>b</sup>   |
| mMRC      | 0.26 ± 0.12                      | 0.17 ± 0.48                  | 0.804                |
| CQLQ      | -0.87 ± 1.68                     | 11.00 ± 5.19                 | 0.027 <sup>b</sup>   |
| EQ-5D     | 0.012 ± 0.023                    | -0.074 ± 0.062               | 0.235                |
| Cough VAS | 0.38 ± 0.325                     | 1.50 ± 1.147                 | 0.284                |

Values are presented as mean ± standard error.

CAT, chronic obstructive pulmonary disease (COPD) assessment test; SGRQ, St. George's Respiratory Questionnaire; mMRC, modified Medical Research Council; CQLQ, cough quality of life questionnaire; EQ-5D, EuroQol-5 dimension; VAS, visual analogue scale.

<sup>a</sup>The analysis was carried out with 59 patients excluding 11 patients who were lost to follow-up. Differences between the two groups were tested using repeated measures analysis of variance (RM-ANOVA).

<sup>b</sup> $p < 0.05$ .
