# Supplementary material for: Prevalence and impact of airway diseases on clinical outcomes in idiopathic pulmonary fibrosis
Source: PubMed Central journal article supplement — Korean J Intern Med. 2021 Dec 7;37(2):387–97. doi: 10.3904/kjim.2021.025 (PMC8925941; doi:10.3904/kjim.2021.025), 2021-12-07
Supplement: kjim-2021-025-suppl3.pdf [file kjim-2021-025-suppl3.pdf]

**Supplementary Table 3. Comparison of the groups with and without airway diseases after propensity score matching with FVC and FEV1**

| Variable                            | Without airway diseases (n = 18) | With airway diseases (n = 6) | p value              |
|-------------------------------------|----------------------------------|------------------------------|----------------------|
| Age, yr                             | 66.72 ± 1.36                     | 72.00 ± 2.97                 | 0.082                |
| Male sex                            | 13 (72.2)                        | 4 (66.7)                     | 1.000                |
| BMI, kg/m <sup>2</sup>              | 25.17 ± 0.65                     | 22.83 ± 0.80                 | 0.070                |
| Smoking status                      |                                  |                              | 0.613                |
| Never                               | 7 (41.2)                         | 1 (20.0)                     |                      |
| Ever                                | 10 (58.8)                        | 4 (80.0)                     |                      |
| Current                             | 0                                | 0                            |                      |
| Smoking amount, pack-yr             | 18.92 ± 4.40                     | 22.00 ± 6.04                 | 0.903                |
| FEV1, % pred                        | 77.33 ± 2.29                     | 73.83 ± 3.88                 | 0.450                |
| FVC, % pred                         | 69.67 ± 2.74                     | 75.00 ± 5.03                 | 0.348                |
| DLco, % pred                        | 62.17 ± 3.05                     | 52.60 ± 5.95                 | 0.160                |
| FEV1/FVC, % pred                    | 78.33 ± 1.17                     | 67.67 ± 2.84                 | < 0.001 <sup>a</sup> |
| FEV1, 3-month follow-up, % pred     | 77.83 ± 2.42                     | 78.83 ± 4.57                 | 0.779                |
| FVC, 3-month follow-up, % pred      | 69.06 ± 2.87                     | 77.33 ± 5.62                 | 0.172                |
| DLco, 3-month follow-up, % pred     | 59.71 ± 3.43                     | 49.33 ± 4.84                 | 0.239                |
| FEV1/FVC, 3-month follow-up, % pred | 78.59 ± 1.45                     | 70.33 ± 3.31                 | 0.015 <sup>a</sup>   |
| 6MWD, m                             | 469.35 ± 20.78                   | 388.50 ± 43.92               | 0.076                |
| 6MWT, nadir SpO <sub>2</sub> , %    | 87.31 ± 1.97                     | 84.17 ± 5.25                 | 0.710                |

Values are presented as mean ± standard error or number (%). Differences between two groups were tested with *t* tests for continuous variables and chi-squared test for dichotomous variables.

FVC, forced vital capacity; FEV1, forced expiratory volume in 1 second; BMI, body mass index; % pred, % of predicted value; DLco, diffusing capacity for carbon monoxide; 6MWD, distance of 6-minute walk test; 6MWT, 6-minute walk test; SpO<sub>2</sub>, resting peripheral oxygen saturation.

<sup>a</sup>*p* < 0.05.
