# Supplementary material for: Prevalence and impact of airway diseases on clinical outcomes in idiopathic pulmonary fibrosis
Source: PubMed Central journal article supplement — Korean J Intern Med. 2021 Dec 7;37(2):387–97. doi: 10.3904/kjim.2021.025 (PMC8925941; doi:10.3904/kjim.2021.025), 2021-12-07
Supplement: kjim-2021-025-suppl4.pdf [file kjim-2021-025-suppl4.pdf]

**Supplementary Table 4. Comparison of the groups with and without inhaler use**

| Variable                            | Without inhaler use (n = 37) | With inhaler use (n = 11) | p value            |
|-------------------------------------|------------------------------|---------------------------|--------------------|
| Age, yr                             | 67.32 ± 1.20                 | 68.64 ± 2.91              | 0.629              |
| Male sex                            | 30 (81.1)                    | 8 (72.7)                  | 0.549              |
| BMI, kg/m <sup>2</sup>              | 24.68 ± 0.49                 | 23.98 ± 0.65              | 0.474              |
| Smoking status                      |                              |                           | 0.605              |
| Never                               | 13 (36.1)                    | 6 (54.5)                  |                    |
| Ever                                | 22 (61.1)                    | 5 (45.5)                  |                    |
| Current                             | 1 (2.8)                      | 0                         |                    |
| Smoking amount, pack-yr             | 15.83 ± 2.75                 | 12.73 ± 4.54              | 0.582              |
| FEV1, % pred                        | 89.64 ± 2.51                 | 86.45 ± 6.54              | 0.178              |
| FVC, % pred                         | 75.14 ± 2.10                 | 77.45 ± 5.68              | 0.639              |
| DLco, % pred                        | 69.05 ± 2.72                 | 58.82 ± 4.94              | 0.078              |
| FEV1/FVC, % pred                    | 82.65 ± 0.92                 | 77.09 ± 2.44              | 0.053              |
| FEV1, 3-month follow-up, % pred     | 87.89 ± 2.61                 | 90.78 ± 7.22              | 0.650              |
| FVC, 3-month follow-up, % pred      | 73.89 ± 2.17                 | 80.44 ± 6.25              | 0.225              |
| DLco, 3-month follow-up, % pred     | 66.47 ± 3.08                 | 54.86 ± 7.96              | 0.075              |
| FEV1/FVC, 3-month follow-up, % pred | 82.42 ± 0.99                 | 77.67 ± 2.47              | 0.047 <sup>a</sup> |
| 6MWD, m                             | 482.69 ± 14.14               | 476.80 ± 31.99            | 0.853              |
| 6MWT, nadir SpO <sub>2</sub> , %    | 88.30 ± 1.19                 | 84.50 ± 3.40              | 0.187              |

Values are presented as mean ± standard error or number (%). Differences between two groups were tested with *t* tests for continuous variables and chi-squared test for dichotomous variables.

BMI, body mass index; FEV1, forced expiratory volume in 1 second; % pred, % of predicted value; FVC, forced vital capacity; DLco, diffusing capacity for carbon monoxide; 6MWD, distance of 6-minute walk test; 6MWT, 6-minute walk test; SpO<sub>2</sub>, resting peripheral oxygen saturation.

<sup>a</sup>*p* < 0.05.
