# Supplementary material for: Prevalence and impact of airway diseases on clinical outcomes in idiopathic pulmonary fibrosis
Source: PubMed Central journal article supplement — Korean J Intern Med. 2021 Dec 7;37(2):387–97. doi: 10.3904/kjim.2021.025 (PMC8925941; doi:10.3904/kjim.2021.025), 2021-12-07
Supplement: kjim-2021-025-suppl5.pdf [file kjim-2021-025-suppl5.pdf]

**Supplementary Table 5. Comparison of the groups with and without inhaler use in patients who needed inhalers**

| Variable                            | Without inhaler use (n = 10) | With inhaler use (n = 11) | <i>p</i> value |
|-------------------------------------|------------------------------|---------------------------|----------------|
| Age, yr                             | 69.50 ± 2.52                 | 68.64 ± 2.91              | 0.826          |
| Male sex                            | 5 (50.0)                     | 8 (72.7)                  | 0.284          |
| BMI, kg/m <sup>2</sup>              | 24.27 ± 0.82                 | 24.00 ± 0.65              | 0.798          |
| Smoking status                      |                              |                           | 0.811          |
| Never                               | 4 (44.4)                     | 6 (54.5)                  |                |
| Ever                                | 4 (44.4)                     | 5 (45.5)                  |                |
| Current                             | 1 (11.1)                     | 0                         |                |
| Smoking amount, pack-yr             | 15.44 ± 6.05                 | 12.73 ± 4.54              | 0.744          |
| FEV1, % pred                        | 86.70 ± 5.29                 | 86.45 ± 6.54              | 0.698          |
| FVC, % pred                         | 78.60 ± 4.88                 | 77.45 ± 5.68              | 0.881          |
| DLco, % pred                        | 56.75 ± 4.00                 | 58.82 ± 4.94              | 0.763          |
| FEV1/FVC, % pred                    | 77.00 ± 3.03                 | 77.09 ± 2.44              | 0.981          |
| FEV1, 3-month follow-up, % pred     | 89.30 ± 5.21                 | 90.78 ± 7.22              | 0.868          |
| FVC, 3-month follow-up, % pred      | 81.30 ± 4.79                 | 80.44 ± 6.25              | 0.914          |
| DLco, 3-month follow-up, % pred     | 59.67 ± 4.87                 | 54.86 ± 7.96              | 0.185          |
| FEV1/FVC, 3-month follow-up, % pred | 76.90 ± 3.04                 | 77.67 ± 2.47              | 0.849          |
| 6MWD, m                             | 431.62 ± 33.37               | 476.80 ± 31.99            | 0.341          |
| 6MWT, nadir SpO <sub>2</sub> , %    | 83.30 ± 3.09                 | 84.50 ± 3.40              | 0.518          |

Values are presented as mean ± standard error or number (%). Differences between two groups were tested with *t* tests for continuous variables and chi-squared test for dichotomous variables.

BMI, body mass index; FEV1, forced expiratory volume in 1 second; % pred, % of predicted value; FVC, forced vital capacity; DLco, diffusing capacity for carbon monoxide; 6MWD, distance of 6-minute walk test; 6MWT, 6-minute walk test; SpO<sub>2</sub>, resting peripheral oxygen saturation.
